# Supplementary material for: Berberine Protects Against Simulated Ischemia/Reperfusion Injury-Induced H9C2 Cardiomyocytes Apoptosis In Vitro and Myocardial Ischemia/Reperfusion-Induced Apoptosis In Vivo by Regulating the Mitophagy-Mediated HIF-1α/BNIP3 Pathway
Source: PubMed Central journal article supplement (PMC7120539; doi:10.3389/fphar.2020.00367), 2020-03-27

**Supplemental Figure 1.** BBR regulates BNIP3 expression in an H/R H9C2 cell model. H9C2 cells were cocultured with BBR for 3 h (50  $\mu$ M) and then exposed to H/R. (A and B) RT-PCR and Western blotting were used to detect the mRNA and protein expression of BNIP3. GAPDH was used as a control. (C and D) RT-PCR and Western blotting were used to detect the mRNA and protein expression of BNIP3 after siBNIP3 or siNC transfection. The data are the means  $\pm$  SD (n=3). \* $P$  < 0.05 compared to the control group; # $P$  < 0.05 compared to the H/R group; & $P$  < 0.05 compared to the siNC group.

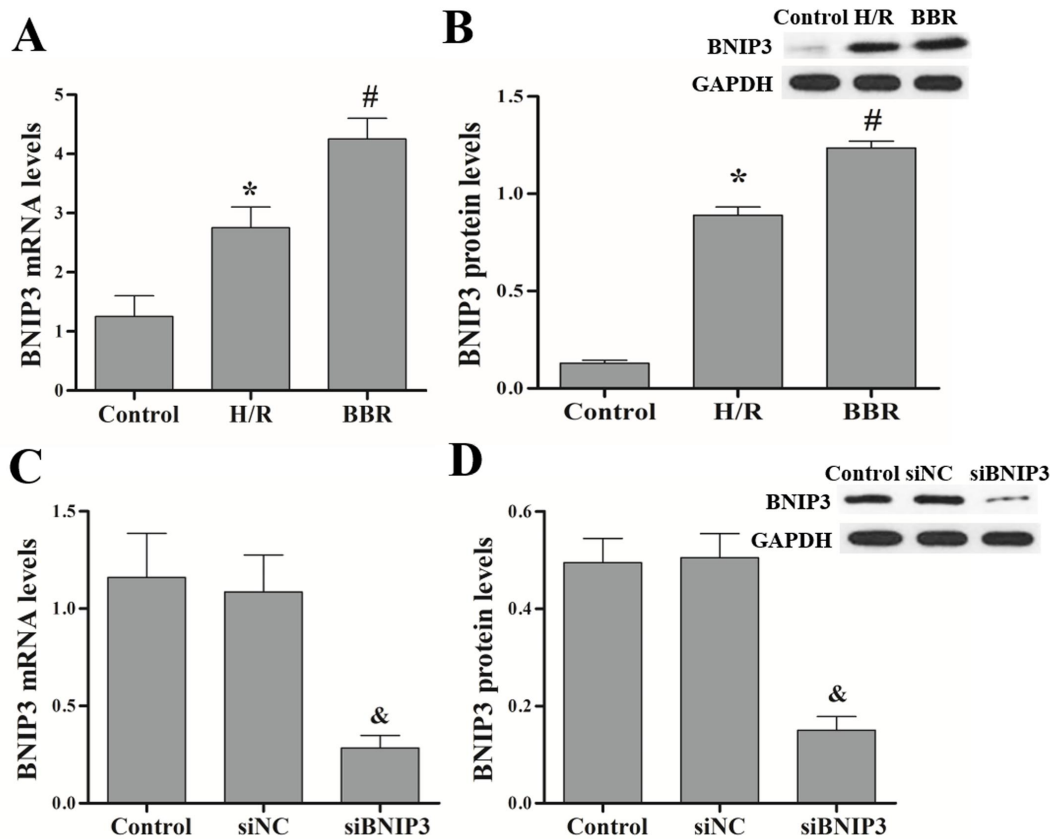

Supplement: Image_1.pdf [file Image_1.pdf]
